# Supplementary material for: Influence of sulfur amount in Ni-incorporated ZnIn2(O,S)4 on phase formation and the visible light photocatalytic hydrogen evolution reaction
Source: Royal Society of Chemistry journal article supplement (doi:10.1039/d1nj01596f), 2021-01-01
Supplement: d1nj01596f1.pdf [file d1nj01596f1.pdf]

### Supplementary information

## Influences of Sulfur Amounts in Ni-Incorporated $\text{ZnIn}_2(\text{O,S})_4$ on Phase Formation and its Visible Light Photocatalytic Hydrogen Evolution Reaction

Sethupathi Shanmugasundaram, Hairus Abdullah, Noto Susanto Gultom, Hardy Shuwanto, Dong-Hau Kuo\*

Department of Materials Science and Engineering, National Taiwan University of Science and Technology, No.43, Sec. 4, Keelung Road, Taipei 10607, Taiwan

\* Corresponding author

E-mail: [dhkuo@mail.ntust.edu.tw](mailto:dhkuo@mail.ntust.edu.tw)

**Table S1.** BET surface area and pore volume of NZI-0 and NZI-1

| Catalysts | Surface<br>area( $\text{m}^2/\text{g}$ ) | Total pore<br>volume( $\text{cm}^3/\text{g}$ ) |
|-----------|------------------------------------------|------------------------------------------------|
| NZI-0     | 2.4                                      | 0.012                                          |
| NZI-1     | 84.73                                    | 0.130                                          |

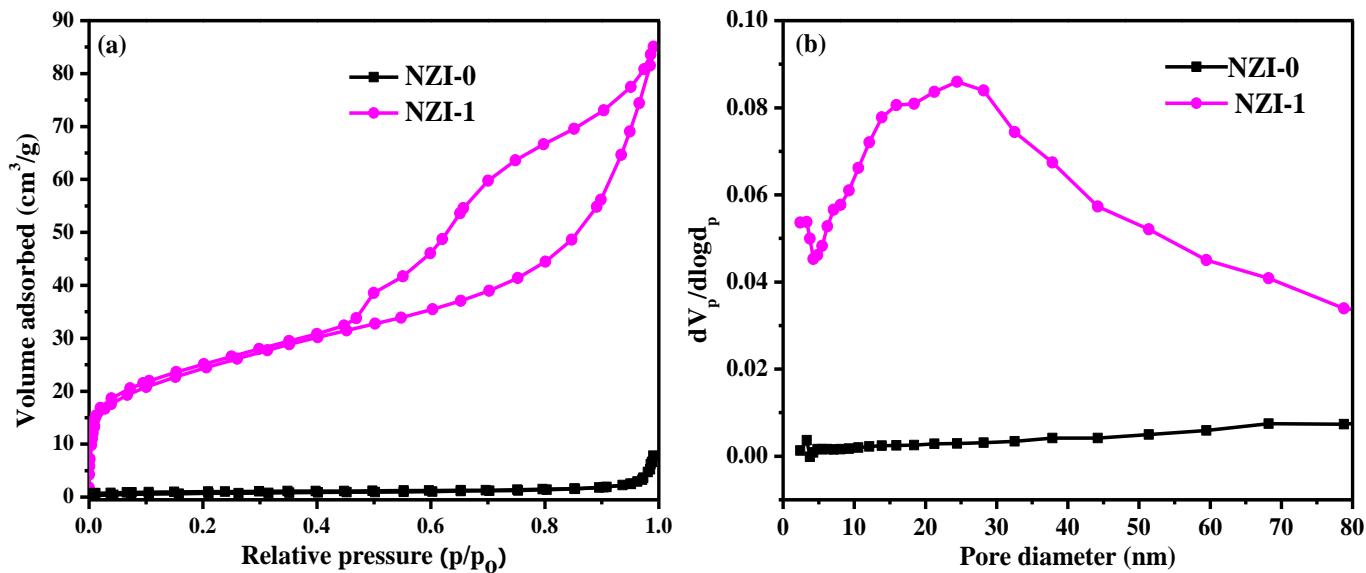

**Figure S1.** (a) Nitrogen adsorption-desorption isotherms (b) BJH pore size distributions of NZI-0 and NZI-1
